1 **Prediction of diabetic kidney disease risk using machine learning models: a population-based**  
2 **cohort study of Asian adults**

3

4 **Running Head: Machine learning and DKD**

5

6 Charumathi Sabanayagam<sup>1,2</sup>, Feng He<sup>1</sup>, Simon Nusinovici,<sup>1</sup> Jialiang Li,<sup>3</sup> Cynthia Lim,<sup>4</sup> Gavin Tan,<sup>1,2</sup>

7 Ching-Yu Cheng<sup>1,2</sup>

8 1. Singapore Eye Research Institute, Singapore National Eye Centre, Singapore

9 2. Ophthalmology and Visual Sciences Academic Clinical Program, Duke-NUS Medical School,  
10 Singapore

11 3. Department of Statistics & Data Science, Singapore, National University of Singapore,  
12 Singapore

13 4. Department of Renal Medicine, Singapore General Hospital, Singapore

14

15

16 **Corresponding Author:** Associate Professor. Charumathi Sabanayagam, Singapore Eye Research  
17 Institute, The Academia, 20 College Road, Discovery Tower Level 6, Singapore, 169856.

18 Tel: +65 6576 7286 Fax: +65 6225 2568

19 Email: [charumathi.sabanayagam@seri.com.sg](mailto:charumathi.sabanayagam@seri.com.sg)

20

21

22 Word count, abstract= 250 Manuscript= 3742 Tables =2 Figures=3

23 Supplementary Tables: 5

24

25 **ABSTRACT**

26 **Background:** Machine learning (ML) techniques improve disease prediction by identifying the most  
27 relevant features in multi-dimensional data. We compared the accuracy of ML algorithms for  
28 predicting incident diabetic kidney disease (DKD).

29 **Methods:** We utilized longitudinal data from 1365 Chinese, Malay and Indian participants aged 40-  
30 80 years with diabetes but free of DKD who participated in the baseline and 6-year follow-up visit of  
31 the Singapore Epidemiology of Eye Diseases Study (2004-2017). Incident DKD (11.9%) was defined  
32 as an estimated glomerular filtration rate (eGFR)  $<60$  mL/min/1.73m<sup>2</sup> with at least 25% decrease in  
33 eGFR at follow-up from baseline. 339 features including participant characteristics, retinal imaging,  
34 genetic and blood metabolites were used as predictors. Performances of several ML models were  
35 compared to each other and to logic regression (LR) model based on established features of DKD  
36 (age, sex, ethnicity, duration of diabetes, systolic blood pressure, HbA1c, and body mass index) using  
37 area under the receiver operating characteristic curve (AUC).

38 **Results:** ML model, Elastic Net (EN) had the best AUC (95% confidence interval) of 0.851 (0.847-  
39 0.856), which was 7.0% relatively higher than by LR 0.795 (0.790-0.801). Sensitivity and specificity  
40 of EN were 88.2% and 65.9% vs. 73.0% and 72.8% by LR. The top-15 predictors included age,  
41 ethnicity, antidiabetic medication, hypertension, diabetic retinopathy, systolic blood pressure, HbA1c,  
42 eGFR and metabolites related to lipids, lipoproteins, fatty acids and ketone bodies.

43 **Conclusions:** Our results showed ML together with feature selection improves prediction accuracy of  
44 DKD risk in an asymptomatic stable population and identifies novel risk factors including  
45 metabolites.

46

47 **Keywords:** DKD; Elastic net; GBDT; incidence; metabolites; predictors

48 **Funding Support:** This study was supported by the National Medical Research Council,

49 NMRC/OFLCG/001/2017 and NMRC/HCSAINV/MOH-001019-00. The funders had no role in study

50 design, data collection and analysis, decision to publish, or preparation of the manuscript.

51 **Conflicts of interest:** None declared.

52

## 53 INTRODUCTION

54 Diabetes currently affects an estimated of 415 million people worldwide in 2015, and the number is  
55 expected to increase to 642 million by 2040 with the greatest increase expected in Asia, particularly  
56 India and China [1]. With the rising prevalence of diabetes and population aging, the burden of  
57 diabetic kidney disease (DKD), a leading cause of end-stage renal disease (ESRD), cardiovascular  
58 disease (CVD), and premature deaths, is also set to rise in parallel. Diabetes accounts for 30-50% of  
59 all chronic kidney disease (CKD) cases affecting 285 million people worldwide [2]. As CKD is  
60 asymptomatic till more than 50% of kidney function decline, early detection of individuals with  
61 diabetes who are at risk of developing DKD may facilitate prevention and appropriate intervention for  
62 DKD. Early identification of individuals at risk of developing CKD in type 2 diabetes is challenging.  
63 Therefore, characterization of new biomarkers is urgently needed for identifying individuals at risk of  
64 progressive decline of eGFR and timely intervention for improving outcomes in DKD.

65  
66 Several risk prediction models have been developed in the past for predicting progression to end-stage  
67 renal disease, but studies predicting onset of CKD in diabetic populations are limited. These studies  
68 were focused on clinical populations utilizing data from clinical trials [3] or heterogeneous cohorts of  
69 patients with different CKD definitions [4]. Dunkler et al. showed albuminuria and estimated  
70 glomerular filtration rate (eGFR) were the key predictors and addition of demographic, clinical or  
71 laboratory variables did not improve predictive performance beyond 69% [3]. Current CKD risk  
72 prediction models developed using traditional regression models (e.g., logistic, or linear regression)  
73 perform well when there are only small or moderate numbers of variables or predictors but tend to  
74 overfit if there is a large number of variables. Machine learning methods using ‘Big data’, or multi-  
75 dimensional data may improve prediction as they have less restrictive statistical assumptions  
76 compared to traditional regression models which assume linear relationships between risk factors and  
77 the logit of the outcomes and absence of multi-collinearity among explanatory variables.

78  
79 Diabetes is a metabolic disorder and metabolic changes associated with diabetes lead to glomerular  
80 hypertrophy, glomerulosclerosis, tubulointerstitial inflammation and fibrosis [5]. Several blood

81 metabolites have been shown to be associated with DKD. Similarly, genetic abnormalities in diabetes  
82 have also been shown to increase the risk of DKD. We and several others have previously shown that  
83 retinal microvascular changes including retinopathy, vessel narrowing, or dilation and vessel  
84 tortuosity were associated with CKD [6, 7]. Integrating high-dimensional data from multiple domains  
85 including patient characteristics, clinical and ‘Omics’ data has the potential to aid in risk-stratification,  
86 prediction of future-risk besides providing insights into the pathogenesis [8]. These features may  
87 contribute to the prediction in very complicated ways, and they may not fully satisfy the requirement  
88 for a simple linear logistic model. It is thus more appropriate to consider the ML approaches for a  
89 comprehensive study.

90

91 In the current study, we aimed to evaluate the performance of a set of most common ML models for  
92 predicting 6-year risk of DKD compared to traditional logistic regression and identify important  
93 predictors of DKD in a large population-based cohort study in Singapore with multi-dimension data  
94 including imaging, metabolites and genetic biomarkers.

## 95 **METHODS**

### 96 **Study population**

97 Data for this study was derived from the Singapore Epidemiology of Eye Diseases (SEED) study, a  
98 population-based prospective study of eye diseases in 10,033 Asian adults aged 40-80 years in  
99 Singapore. The follow-up study was conducted after a median duration of 6.08 years (interquartile  
100 range: [5.56, 6.79]) with 6,762 participants. The detailed methodology of the SEED has been  
101 published elsewhere. Briefly, the name list of adults residing in the southwestern part of Singapore  
102 was provided by the Ministry of Home Affairs, and then an age-stratified random sampling procedure  
103 was conducted. A total of 3,280 Malays (2004-2007) [9], 3,400 Indians (2007-2009) and 3,353  
104 Chinese (2009-2011) [10] participated in the baseline study with response rates of 78.7%, 75.6% and  
105 72.8%, respectively. As all three studies followed the same methodology and were conducted in the  
106 same study clinic, we combined the three populations for the present study. For the current analysis,  
107 we included only those with diabetes defined as random glucose  $\geq 11.1$  mmol/L, HbA1c  $\geq 6.5\%$  (48  
108 mmol/mol), self-reported anti-diabetic medication use or having been diagnosed with diabetes by a

109 physician based on American Diabetes association recommendations. Of the 6,762 participants who  
110 attended both baseline and follow-up visit, after excluding those without diabetes (n=5,307), prevalent  
111 CKD (n=315), missing information on eGFR (n=90), final sample size for analysis was 1,365 (47.5%  
112 Indians, 27.8% Malays and 24.7% Chinese). The sample size available for each dataset after  
113 removing participants missing >10% data was between 976 and 1,364 (**Supplementary Table S1**).  
114 This study was performed in accordance with the tenets of the Declaration of Helsinki and ethics  
115 approval was obtained from the Singapore Eye Research Institute Institutional Review Board. Written  
116 informed consent was provided by participants.

### 117 **Assessment of DKD**

118 Incident DKD was defined as an estimated glomerular filtration rate (eGFR) <60 mL/min/1.73m<sup>2</sup> with  
119 at least 25% decrease in eGFR at follow-up in participants who had eGFR>60 mL/min/1.73m<sup>2</sup> at  
120 baseline. Combining change in eGFR category together with a minimal percent change ensures that  
121 small changes in eGFR, for e.g., from 61 to 59 mL/min/1.73m<sup>2</sup> is not misinterpreted as incident CKD  
122 as the eGFR is <60 mL/min/1.73m<sup>2</sup> [7, 11]. The reduction in eGFR at follow-up was calculated as a  
123 percentage of the baseline eGFR as (eGFR at baseline – eGFR at follow-up)/eGFR at baseline \*100%.  
124 GFR was estimated from plasma creatinine using the Chronic Kidney Disease Epidemiology  
125 Collaboration (CKD-EPI) equation [12]. Blood creatinine was measured by the Jaffe method on the  
126 Beckman DXC800 analyzer calibrated to the Isotope Dilution Mass Spectrometry (IDMS) method  
127 using the National Institute of Standards and Technology (NIST) Reference material. Based on the  
128 level of eGFR, DKD severity was classified into 4 groups: eGFR ≥60 (reference representing  
129 normal/high/mild decrease in kidney function, mild-to-moderate (eGFR 45-59), moderate-to-severe  
130 (eGFR 30-44), and severe/renal failure (eGFR<30) [13].

### 131 **Variables for prediction**

132 We evaluated 339 features such as demographic, lifestyle, socioeconomic, physical, laboratory, retinal  
133 imaging, genetic and blood metabolomics profile. The entire list of variables is presented in  
134 **Supplementary Table S2**. We organized the variables into five different domains: traditional risk  
135 factors, extended risk factors, imaging parameters, genetic parameters, and blood metabolites. For ML  
136 analysis, based on different combinations of the five domains, we tested six models (A to F):

137 A=Traditional risk factors; B= A+ Extended risk factors; C= B+ Imaging parameters; D= B+ Genetic  
138 parameters; E= B+ Blood metabolites; F= B+ Imaging parameters+ Blood metabolites+ Genetic  
139 parameters.

140 **Traditional risk factors (n=7)**

141 Age, sex, ethnicity, body mass index (BMI), systolic blood pressure (BP), duration of diabetes and  
142 HbA1c% were included as traditional risk factors.

143 **Extended risk factors (n=22):**

144 Marital status, educational level, monthly income, smoking status, alcohol consumption, history of  
145 cardiovascular disease, hypertension status, diastolic BP, pulse pressure, blood glucose, total, high-  
146 density lipoprotein (HDL) and low-density lipoprotein (LDL) cholesterol levels, anti-diabetic, anti-  
147 hypertensive, and anti-cholesterol medication use were included as part of extended risk factors.

148 **Blood metabolites (n=223):**

149 We quantified 228 metabolic measures from stored serum/plasma samples at baseline using a high-  
150 throughput NMR metabolomics platform (Nightingale Health, Helsinki, Finland). The metabolites  
151 included routine lipids, lipoprotein subclasses with lipid concentrations within 14 subclasses, fatty  
152 acids, amino acids, ketone bodies, and glycolysis-related metabolites. The 14 lipoprotein subclasses  
153 include six subclasses of VLDL (extremely large, very large, large, medium, small, very small), IDL,  
154 three subclasses of LDL (large, medium, small), and four subclasses of HDL (very large, large,  
155 medium, small). Lipid concentration within each lipoprotein particle included triacylglycerol, total  
156 cholesterol, non-esterified cholesterol and cholesteryl ester levels, and phospholipid concentrations  
157 [14]. Of the 228 metabolites, pyruvate, glycerol and glycine were not available in Malays. In addition,  
158 creatinine and glucose were measured as part of the blood biochemistry. After excluding these five  
159 metabolites, 223 were included under the metabolites dataset.

160 **Genetic parameters (n=76):** We included 76 type 2 diabetes-associated single nucleotide  
161 polymorphisms (SNPs) identified in the largest meta-analysis of type 2 diabetes genome-wide  
162 association studies by the DIAbetes Genetics Replication and Meta-analysis (DIAGRAM) consortium  
163 [15].

164 **Imaging parameters (n=11)**

165 Using a semi-automated computer program (Singapore I Vessel Assessment- SIVA) we quantified  
166 retinal imaging parameters from digital retinal photographs. The parameters included retinal arteriolar  
167 and venular diameters, vessel tortuosity, branching angle, fractal dimension etc. [7]. Diabetic  
168 retinopathy (DR) was assessed by trained graders using a standard protocol [16].

### 169 **Machine learning algorithms**

170 We tested 9 different ML algorithms including logistic regression (LR), LASSO logistic regression  
171 (LASSO), elastic net (EN), classification and regression tree (CART), random forest (RF), gradient  
172 boosting decision tree (GBDT), extreme gradient boosting (XGB), support vector machine (SVM),  
173 and naïve Bayes (NB) [17].

174 **Model development:** We split the study samples randomly into training (80%) and test sets (20%) of  
175 equal CKD case rate by stratified sampling, with 40 random repeats of 5-fold cross-validation to  
176 evaluate the model performance. Predictive accuracy was assessed using metrics such as area under  
177 the receiver operating characteristic curve (AUC) with 95% confidence interval (CI), sensitivity and  
178 specificity calculated at the optimal cut-point (determined by Youden's index). In preliminary  
179 analyses, testing different combinations of features (**Figure 1A to 1F**), performance of all ML models  
180 was below 0.80 in dataset D including genetic features (best AUC= 0.785 by RF) and Dataset F  
181 including all 339 features (best AUC=0.788 by XGB). Hence, we dropped these 2 datasets (D and F)  
182 from further analyses. The performance of all ML models based on AUC (IQR) in Dataset 1A-1F is  
183 shown in **Supplementary Table S3** and based on sensitivity and specificity is shown in  
184 **Supplementary Table S4**.

185 **Figure 1. Comparison of 9 machine learning models for DKD incidence prediction.**



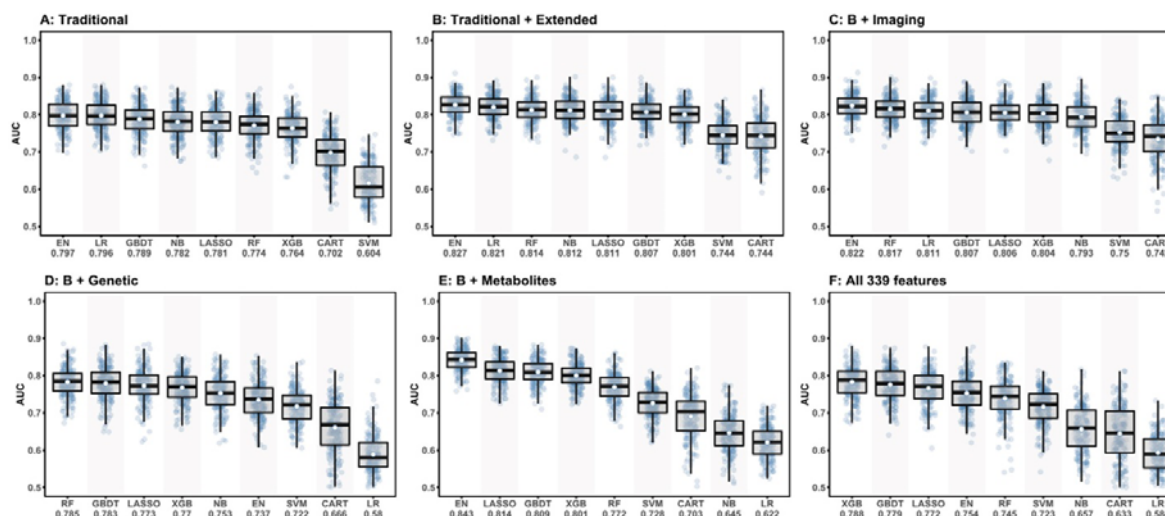

186

187

Of the ML models, performances of CART, SVM and NB were lower compared to other models,

188

hence these models were also dropped. Consequently, ML models EN, GBDT, LASSO, XGB and RF

189

were considered for subsequent analyses using datasets A, B, C, and E including 252 features.

190

**Feature selection:** All algorithms included in the current study can perform feature selection but

191

using different selection criteria. In LR, stepwise selection according to the Akaike information

192

criterion (AIC) is widely used but it lacks stability. LASSO is an extension of LR with L1

193

regularization to drop the less important variables. EN is like LASSO but with a milder regularization,

194

resulting in a larger number of retained variables. In order to select only the most predictive features,

195

we recursively apply EN until the retained variable subset is optimized, i.e., recursive feature

196

selection (RFE). In RF, GBDT, and XGB, the most predictive variables were identified based on their

197

relative importance to model performance. Feature selection was also performed according to their

198

selection frequency during repeated cross-validation. We identified the top-15 predictors by each of

199

the best performing ML models, then compared the performance of the ML models based on the top

200

variables with that of logistic regression based on seven traditional risk factors (age, sex, ethnicity,

201

BMI, HbA1c, duration of diabetes, and systolic BP) in another 40 random repeats of five-fold cross-

202

validation.

203

**Statistical analyses:** We compared the baseline characteristics of participants with diabetes by

204

incident DKD status using chi-square test or Mann-Whitney U Test as appropriate for the variable.

205

Statistical significance was defined as a p-value < 0.05. Subgroup numbers such as diabetic

206

retinopathy status may not add up due to the presence of missing data. For modelling, we used mean

207 values/modes for missing value imputation as appropriate for each variable because the missing  
 208 proportions were all below 10%. Improvement in prediction accuracy by ML over the traditional risk  
 209 factor model was calculated as (ML AUC- traditional model AUC)/traditional model AUC\*100%. All  
 210 analyses were conducted using R software version 4.0.2. To assess whether the features selected by  
 211 ML models are meaningful, we visualized the association of top-15 variables with incident DKD in  
 212 forest plots or a variable importance plot as appropriate for the algorithm.

## 213 RESULTS

214 The 6-year incidence of DKD was 11.9% in the study population. Incidence of DKD was highest in  
 215 Malays (18.4%), followed by Chinese (12.8%). Although Indians represent nearly half of the total  
 216 diabetic population (648 of the 1365 diabetic participants, 47.5%), DKD was lowest in Indians  
 217 (7.6%).

**Table 1. Baseline characteristics of SEED Diabetic participants by incident CKD status**

| Characteristics                      | No CKD<br>(n = 1203) | CKD<br>(n = 162)   | p-value | Overall<br>(n = 1365) |
|--------------------------------------|----------------------|--------------------|---------|-----------------------|
| Age (years)                          | 57.95 (8.78)         | 64.63 (7.98)       | <0.001  | 58.74 (8.95)          |
| Gender, female                       | 580 (48.2)           | 87 (53.7)          | 0.219   | 667 (48.9)            |
| Ethnicity                            |                      |                    | <0.001  |                       |
| Indians (Ref)                        | 599 (49.8)           | 49 (30.2)          |         | 648 (47.5)            |
| Malays                               | 310 (25.8)           | 70 (43.2)          |         | 380 (27.8)            |
| Chinese                              | 294 (24.4)           | 43 (26.5)          |         | 337 (24.7)            |
| Primary/below education, %           | 706 (58.7)           | 121 (74.7)         | <0.001  | 827 (60.6)            |
| Current smoker, %                    | 173 (14.4)           | 16 (9.9)           | 0.15    | 189 (13.9)            |
| Alcohol consumption, %               | 111 (9.2)            | 11 (6.8)           | 0.389   | 122 (9.0)             |
| Hypertension, %                      | 845 (70.4)           | 155 (95.7)         | <0.001  | 1000 (73.4)           |
| Diabetic retinopathy, %              | 228 (19.2)           | 56 (35.4)          | <0.001  | 284 (21.1)            |
| Cardiovascular disease, %            | 153 (12.7)           | 32 (19.8)          | 0.02    | 185 (13.6)            |
| Duration of diabetes (years)         | 2.68 [0.00, 8.56]    | 6.08 [1.44, 11.63] | <0.001  | 3.20 [0.00, 9.37]     |
| Anti-diabetic medication, %          | 681 (56.6)           | 122 (75.3)         | <0.001  | 803 (58.8)            |
| Body mass index (kg/m <sup>2</sup> ) | 26.96 (4.62)         | 27.05 (4.36)       | 0.764   | 26.97 (4.59)          |
| Systolic blood pressure (mm Hg)      | 139.42 (18.95)       | 155.24 (20.01)     | <0.001  | 141.29 (19.74)        |
| Diastolic blood pressure (mm Hg)     | 78.25 (9.74)         | 79.14 (10.70)      | 0.278   | 78.35 (9.85)          |
| Random blood glucose (mmol/L)        | 9.53 (4.26)          | 10.44 (5.01)       | 0.052   | 9.64 (4.36)           |
| HbA1c, %                             | 7.61 (1.58)          | 8.04 (1.83)        | 0.003   | 7.66 (1.62)           |

|                                    |               |               |        |               |
|------------------------------------|---------------|---------------|--------|---------------|
| Blood total Cholesterol (mmol/L)   | 5.14 (1.14)   | 4.98 (1.15)   | 0.124  | 5.12 (1.15)   |
| Blood HDL Cholesterol (mmol/L)     | 1.12 (0.31)   | 1.16 (0.35)   | 0.178  | 1.12 (0.32)   |
| eGFR (mL/min/1.73 m <sup>2</sup> ) | 89.98 (14.34) | 79.40 (11.69) | <0.001 | 88.72 (14.46) |

**Abbreviations:** HDL, high-density lipoprotein cholesterol; SD, standard deviation; IQL, interquartile range.

Values for categorical variables are presented as number (percentages); values for continuous variables are given as mean (SD) or median [IQR]. p-values are given by  $\chi^2$ -test or Mann-Whitney U test as appropriate for the variable.

218

219 As shown in **Table 1**, compared to those without incident DKD, those with were significantly older,  
220 more likely to be Malays or Chinese, primary/below educated, had higher prevalence of hypertension,  
221 diabetic retinopathy, cardiovascular disease, anti-diabetic medication use; had longer duration of  
222 diabetes, higher levels of systolic BP and HbA1c%.

### 223 **Performance of LR using traditional risk factors (Reference) and other domain features**

224 The LR using the 7 traditional risk factors (age, sex, ethnicity, BMI, HbA1c, duration of diabetes, and  
225 systolic BP) had an AUC of 0.796. Performance of LR improved to 0.821 using the traditional+  
226 extended risk factors. With additional features, performance of LR dropped significantly (AUC of  
227 0.622 in E and 0.811 in C).

### 228 **Performance of ML models using multi-dimensional data**

229 Using datasets, A, B, C, and E, the performances of the 5 ML models (**Figure 1A-1C and 1E**) were:

230 1) EN ranked first in performance in all 5 datasets with AUCs ranging from 0.797 in A to 0.843 in E

231 2) LASSO ranged from 0.781 in A to 0.814 in E

232 3) GBDT ranged from 0.789 in A to 0.809 in E

233 4) Performance of RF ranged from 0.772 in E to 0.817 in C

234 5) XGB ranged from 0.764 in A to 0.804 in C

235 **Figure 2** shows the AUCs of the top 3 performing models. Using the top-15 predictors generated by  
236 feature selection, performance of EN improved further with an AUC (95% CI) of 0.851 (0.847-0.856),  
237 sensitivity and specificity of 88.2% and 65.9% compared to LR using seven established features with  
238 AUC of 0.795 (0.790-0.801) and sensitivity and specificity of 73.0% and 72.8%.

239 **Figure 2. Comparison of top-3 ML models based on selected variables in dataset E (Risk factors**

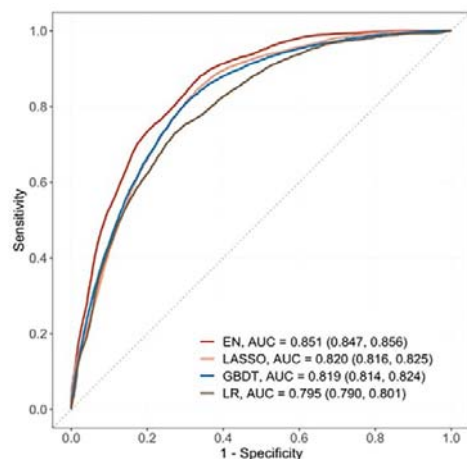

240 **+ blood metabolites)**

241

242 Corresponding estimates for LASSO were 0.820 (0.816-0.825), 84.4% and 67.0%; 0.819 (0.814-

243 0.824), 80.6% and 70.1% for GBDT. AUC of EN, LASSO and GBDT were 7.0%, 3.1% and 3.0%

244 relatively higher than that of LR.

245 **Top 15 predictors**

246 **Figure 3** shows the top 15 predictors visualised using forest plots for EN and LASSO and a variable

247 importance plot for GBDT.

248 **Figure 3. Association of top-15 ML-selected predictors with incident CKD**

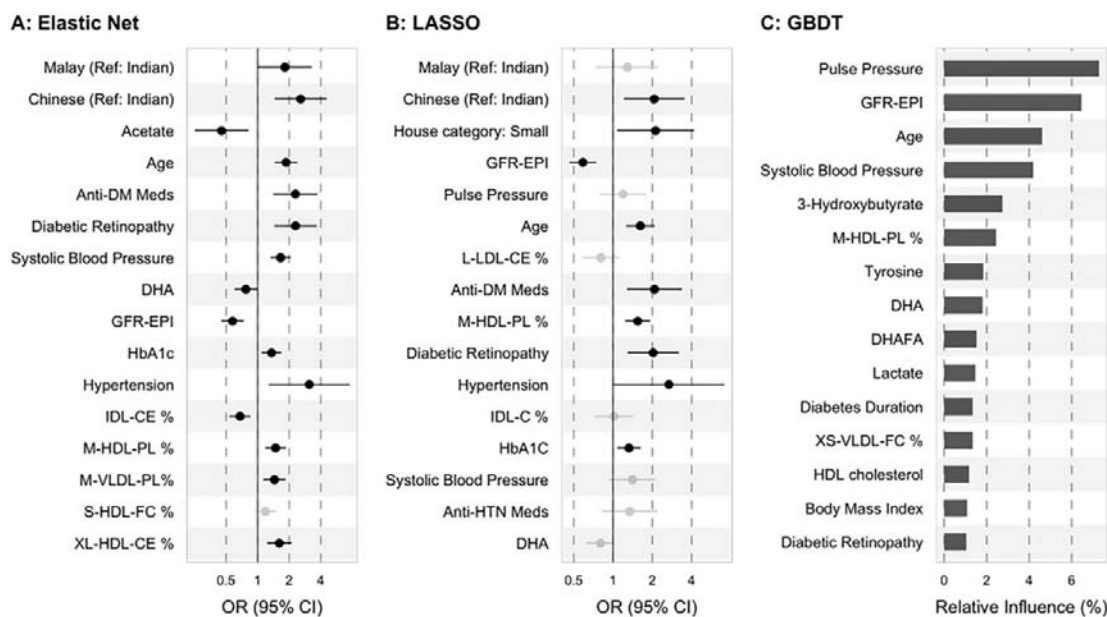

249

250 Among the traditional and extended risk factors, all 3 models chose age, SBP, any diabetic  
 251 retinopathy, and lower levels of eGFR as top 15 predictors. In addition, anti-diabetic medication use,  
 252 HbA1c, hypertension, and ethnicity (Malay and Chinese as compared to Indians) were chosen as risk  
 253 factors by EN and LASSO; anti-hypertensive medication and low housing type by LASSO; duration  
 254 of diabetes, BMI and HDL cholesterol by GBDT. Among the metabolites, phospholipids to total  
 255 lipids ratio in MHDL and DHA were selected by all 3 models. Free cholesterol to total  
 256 lipids ratio in small HDL/XSVLDL, cholesterol esters to total lipids ratio in IDL/LLDL/XLHDL were also found of  
 257 high frequency. Additionally, higher levels of acetate were shown to be protective by LR based on  
 258 EN-selected variables, while tyrosine and lactate were identified as important factors by GBDT.  
 259 Source data for the forest plots are shown in **Supplementary Table S5**.

260 **DISCUSSION**

261 The results of the current study suggest that prediction using ML models with selected features  
 262 provided improved prediction compared to LR model based on seven established features in this  
 263 extensively phenotyped large-scale epidemiological study. The best performance was obtained by EN  
 264 model based on dataset E including risk factors and metabolites with AUC of 0.851 which was 7.0%  
 265 higher than that of LR using seven established risk factors. Sensitivity was also higher by EN (88.2%  
 266 and 65.9%) compared to LR (73.0% and 72.8%). Top-15 predictors by EN using RFE identified

267 several metabolites related to lipid concentration, lipoprotein subclasses, fatty acids, and ketone  
 268 bodies as novel predictors besides confirming traditional predictors including age, ethnicity,  
 269 antidiabetic medication use, presence of hypertension, diabetic retinopathy, higher levels of systolic  
 270 blood pressure, HbA1c, and lower levels of eGFR. Contrary to conventional risk factors, sex, BMI,  
 271 and duration of diabetes did not come in the top 15-predictors.

272

273 Our results showed that ML models combined with feature selection improved the accuracy for  
 274 predicting incident DKD in high-dimensional datasets. AUC of MLs based on dataset E including  
 275 metabolites (+risk factors) scored highest while the one based on Dataset D including genetic features  
 276 scored lowest compared to other domain features. This finding suggests that modifiable risk factors  
 277 and metabolites predict DKD risk better than genetic features. Predictive performance was best by  
 278 EN, followed by LASSO and GBDT. Top-15 predictors selected by LASSO and GBDT were largely  
 279 consistent to that by EN.

280

281 Few previous studies have evaluated the performance of ML models for predicting the risk of incident  
 282 DKD (**Table 2**). Ravizza et al. identified seven key features (age, BMI, eGFR, concentration of  
 283 creatinine, glucose, albumin and HbA1c%) by a data-driven feature selection strategy for predicting  
 284 DKD using EHR data from 417,912 people with diabetes retrieved from the IBM Explorys Database  
 285 and developed a random forest model in 82,912 people with diabetes retrieved from Indiana Network  
 286 for Patient Care (INPC). The RF algorithm using seven prioritized key features achieved an AUC of  
 287 0.833 as compared to 0.827 by logistic regression [18].

**Table 2. Machine learning model for predicting incident CKD in literature**

| Author, journal                                        | Study cohort<br>Country                                    | Study<br>population<br>Follow up                        | CKD<br>Definition and<br>incidence | Number of<br>predictors | ML Performance                                                                                  |
|--------------------------------------------------------|------------------------------------------------------------|---------------------------------------------------------|------------------------------------|-------------------------|-------------------------------------------------------------------------------------------------|
| Ravizza et al.[18]<br><i>Nature Medicine</i> ,<br>2019 | EHR data<br>from the IBM<br>Explorys and<br>INPC datasets, | Development<br>cohort (IBM):<br>>500,000<br>adults with | ICD 9/10 codes                     | 300<br>features         | Based on 7 prioritized<br>features, AUC by RF =<br><b>0.833</b> and The<br>Roche/IBM supervised |

|                                               |                                          |                                                                                |                                                     |                                       |                                                                                                                                                                     |
|-----------------------------------------------|------------------------------------------|--------------------------------------------------------------------------------|-----------------------------------------------------|---------------------------------------|---------------------------------------------------------------------------------------------------------------------------------------------------------------------|
|                                               | US                                       | diabetes.<br>Validation<br>(INPC)=<br>82912 adults<br>with T2DM;<br>FU=3 years |                                                     |                                       | algorithm by LR = <b>0.827</b>                                                                                                                                      |
| Song X et al.[19]<br><i>JMIR</i> , 2020       | EHR data, US<br>(2007-2017)              | 14039 adults<br>with T2DM.<br>FU=1-year                                        | eGFR<60 or<br>UACR≥30 mg/g;<br>34.1%                | >3000                                 | GBM<br><b>AUC = 0.83</b>                                                                                                                                            |
| Huang et al.[20]<br><i>Diabetes</i> , 2021    | KORA cohort,<br>Germany                  | 1838 adults<br>with<br>prediabetes<br>and T2DM<br>FU=6.5y                      | eGFR<60 or<br>UACR≥30 mg/g<br>at FU.<br>10.9%       | 125<br>mets+14<br>clinical<br>factors | SVM, RF, Ada Boost<br>Best set: Mets- SM and<br>PC+ Age, TC, FPG,<br>eGFR, UACR, <b>AUC =<br/>0.857</b><br>Traditional LR using 14<br>variables, <b>AUC = 0.809</b> |
| Sabanayagam et al.<br>(2022)<br>Current study | SEED<br>population<br>data,<br>Singapore | 1365 adults<br>with diabetes.<br>FU=6 years                                    | eGFR<60<br>+25% decline<br>in eGFR from<br>baseline | 339<br>features                       | EN+RFE selected 15<br>features, <b>AUC = 0.851 vs.<br/>0.795</b> using 7 features by<br>traditional LR                                                              |

288

289 Song et al. predicted 1-year risk of DKD based on EHR data using Gradient Boosting Machine (GBM)  
290 algorithm with an AUC of 83% [19]. As the median duration of development of DKD is ~10 years  
291 since the onset of diabetes, predicting 1 year risk may not be sufficient. Huang et al. predicted DKD  
292 risk in 1,838 adults with diabetes and prediabetes who participated in the KORA Study in Germany.  
293 Authors used ML models Support Vector Machine (SVF), RF and Ada Boost based on 14 clinical  
294 factors and 125 metabolites. The best set AUC was 0.857 which is similar to that of our model using  
295 EN (AUC=0.851).

296

297 In the current study, we observed that when the features are limited to the traditional risk factors,  
298 performance of LR was similar to that of the best ML model EN, but when number of features is  
299 huge, LR performance dropped significantly compared to the top performing ML models including  
300 EN, LASSO and GBDT. In a previous study based on the same dataset as the current study,

301 Nusinovici et al. tested the performance of several ML models utilizing 20 risk factors alone, found  
302 that the performance of LR (AUC=0.905) was similar to that of the best ML model, GBDT  
303 (AUC=0.903) for predicting incident CKD in those with and without diabetes [21]. When a large  
304 number of features are present, ML methods may capture the complicated functional dependency of  
305 the incident CKD outcome much better than the linear approach used in LR.

306

307 The risk factors identified by the top-performing ML models (EN, LASSO, GBDT) are established  
308 risk factors such as age, ethnicity, antidiabetic medication use, presence of hypertension, diabetic  
309 retinopathy, higher levels of systolic blood pressure, HbA1c, and lower levels of eGFR. Additionally,  
310 anti-hypertensive medication use, and low housing type were identified by LASSO while BMI,  
311 duration of diabetes by GBDT. Increasing age, longer duration of diabetes, higher levels of HbA1c,  
312 systolic blood pressure/hypertension are well known risk factors of DKD. Older age, hypertension,  
313 lower eGFR, higher levels of BMI, HbA1c and antidiabetic medication use were identified to be  
314 significant risk factors for incident CKD in those with diabetes by Nelson et al. in a meta-analysis  
315 including 15 multi-national cohorts with diabetes as part of the CKD Prognosis Consortium (CKD-  
316 PC) [22]. While black ethnicity was a risk factor for CKD in the meta-analysis, in our study, we found  
317 Chinese and Malay ethnicity to be at higher risk of developing incident DKD compared to Indian  
318 ethnicity. One reason for the Indian ethnicity to be at lower risk of developing DKD could be Indian  
319 ethnicity being a high-risk group for diabetes, they may be well aware of the risk, and comply with  
320 screening, medication etc. that could reduce their risk of developing DKD. Malay ethnicity has been  
321 identified to be a high-risk group for CKD by several studies conducted in Singapore. Surprisingly,  
322 gender was not identified to be a risk factor by any of the 3 ML models. This finding is consistent to  
323 Ravizza et al. algorithm based on data-driven feature selection which did not pick up gender as one of  
324 the priority features [18].

325

326 In the current study, several new predictors from the metabolites domain were identified. We found  
327 lipid metabolites including phospholipids in HDL and VLDL subclasses, cholesterol esters, and free  
328 cholesterol in HDL subclasses were associated with increased risk of DKD while cholesterol esters in



329 IDL to be protective against DKD. Further, higher levels of DHA, acetate and tyrosine also showed a  
330 protective association (odds ratios not shown). In the ADVANCE trial, similar to our findings, higher  
331 tyrosine levels were associated with increased risk of microvascular complications in diabetic  
332 participants. DHA, a n-3 polyunsaturated fatty acid (PUFA) has been shown to reduce renal  
333 inflammation and fibrosis and slow down the progression CKD in animal models with type 2 diabetes  
334 [23] and PUFA supplementation has been shown to reduce hyperglycemia-induced pathogenic  
335 mechanisms by its anti-inflammatory and anti-oxidant properties and to improve renal function in  
336 diabetic nephropathy patients (Liborio-Neto, meta-analysis). Consistent with our findings, higher  
337 levels short-chain fatty acid acetate, have been shown to be inversely associated with diabetic  
338 nephropathy in type 2 diabetic patients [24] and to have beneficial effects in mice models with type 2  
339 diabetes by reducing oxidative stress and inflammation.

340

341 The strengths of our study include a multi-ethnic Asian population with long follow-up and  
342 availability of a wealth of information. Use of RFE for dimension reduction and feature selection  
343 reduced overfitting of data. ML models identify the relative importance of one domain over the other  
344 domains (like metabolite features in our study compared to genetic features) and best predictors  
345 within one domain. Our study results should be interpreted in the light of few limitations. First, our  
346 definition DKD was based on measurement of single blood creatinine both at baseline and follow-up.  
347 This would have resulted in some misclassification, but the bias would be non-differential and would  
348 be similar across both outcomes. Second albuminuria, an important predictor of DKD was not  
349 included as it was missing in a substantial number of participants. Third, external validation was not  
350 performed. Fourth, ML models are computationally intensive compared to traditional regression  
351 models.

352

353 In conclusion, in a population-based sample of multi-ethnic Asian adults, we found that EN with  
354 specific metabolites outperformed the current DKD risk prediction models using demographic and  
355 clinical variables. Our results provide evidence that combining metabolites and ML models could

356 improve prediction accuracy for DKD and that increasing use of ML techniques may discover new  
357 risk factors for DKD. Further testing in external populations would support the validity of the model.

358

359 **Data Availability Statement:** As the study involves human participants, the data cannot be made  
360 freely available in the manuscript, the supplemental files, or a public repository due to ethical  
361 restrictions. Nevertheless, the data are available from the Singapore Eye Research Institutional Ethics  
362 Committee for researchers who meet the criteria for access to confidential data. Interested researchers  
363 can send data access requests to the Singapore Eye Research Institute using the following email  
364 address: [seri@seri.com.sg](mailto:seri@seri.com.sg).

365 Processed version of the datasets are provided in **Supplementary Tables S1-S5**.

366

367 **REFERENCES**

- 368 1. Ogotsova K, da Rocha Fernandes JD, Huang Y, Linnenkamp U, Guariguata L, Cho NH, et  
369 al. IDF Diabetes Atlas: Global estimates for the prevalence of diabetes for 2015 and 2040. *Diabetes*  
370 *research and clinical practice*. 2017 Jun;128:40-50. PMID: 28437734. doi:  
371 10.1016/j.diabres.2017.03.024.
- 372 2. Webster AC, Nagler EV, Morton RL, Masson P. Chronic Kidney Disease. *Lancet*. 2017 Mar  
373 25;389(10075):1238-52. PMID: 27887750. doi: 10.1016/S0140-6736(16)32064-5.
- 374 3. Dunkler D, Gao P, Lee SF, Heinze G, Clase CM, Tobe S, et al. Risk Prediction for Early  
375 CKD in Type 2 Diabetes. *Clin J Am Soc Nephrol*. 2015 Aug 7;10(8):1371-9. PMID: 26175542. doi:  
376 10.2215/CJN.10321014.
- 377 4. Jiang W, Wang J, Shen X, Lu W, Wang Y, Li W, et al. Establishment and Validation of a  
378 Risk Prediction Model for Early Diabetic Kidney Disease Based on a Systematic Review and Meta-  
379 Analysis of 20 Cohorts. *Diabetes Care*. 2020 Apr;43(4):925-33. PMID: 32198286. doi: 10.2337/dc19-  
380 1897.
- 381 5. Alicic RZ, Rooney MT, Tuttle KR. Diabetic Kidney Disease: Challenges, Progress, and  
382 Possibilities. *Clin J Am Soc Nephrol*. 2017 Dec 7;12(12):2032-45. PMID: 28522654. doi:  
383 10.2215/CJN.11491116.
- 384 6. Yau JW, Xie J, Kawasaki R, Kramer H, Shlipak M, Klein R, et al. Retinal arteriolar  
385 narrowing and subsequent development of CKD Stage 3: the Multi-Ethnic Study of Atherosclerosis  
386 (MESA). *Am J Kidney Dis*. 2011 Jul;58(1):39-46. PMID: 21549464. doi: 10.1053/j.ajkd.2011.02.382.
- 387 7. Yip W, Ong PG, Teo BW, Cheung CY, Tai ES, Cheng CY, et al. Retinal Vascular Imaging  
388 Markers and Incident Chronic Kidney Disease: A Prospective Cohort Study. *Sci Rep*. 2017 Aug  
389 24;7(1):9374. PMID: 28839244. doi: 10.1038/s41598-017-09204-2.
- 390 8. Eddy S, Mariani LH, Kretzler M. Integrated multi-omics approaches to improve classification  
391 of chronic kidney disease. *Nat Rev Nephrol*. 2020 Nov;16(11):657-68. PMID: 32424281. doi:  
392 10.1038/s41581-020-0286-5.
- 393 9. Foong AW, Saw SM, Loo JL, Shen S, Loon SC, Rosman M, et al. Rationale and  
394 methodology for a population-based study of eye diseases in Malay people: The Singapore Malay eye

- 395 study (SiMES). *Ophthalmic Epidemiol.* 2007 Jan-Feb;14(1):25-35. PMID: 17365815. doi:  
396 10.1080/09286580600878844.
- 397 10. Lavanya R, Jeganathan VS, Zheng Y, Raju P, Cheung N, Tai ES, et al. Methodology of the  
398 Singapore Indian Chinese Cohort (SICC) eye study: quantifying ethnic variations in the epidemiology  
399 of eye diseases in Asians. *Ophthalmic Epidemiol.* 2009 Nov-Dec;16(6):325-36. PMID: 19995197.  
400 doi: 10.3109/09286580903144738.
- 401 11. Stevens PE, Levin A, Kidney Disease: Improving Global Outcomes Chronic Kidney Disease  
402 Guideline Development Work Group M. Evaluation and management of chronic kidney disease:  
403 synopsis of the kidney disease: improving global outcomes 2012 clinical practice guideline. *Ann*  
404 *Intern Med.* 2013 Jun 4;158(11):825-30. PMID: 23732715. doi: 10.7326/0003-4819-158-11-  
405 201306040-00007.
- 406 12. Levey AS, Stevens LA, Schmid CH, Zhang YL, Castro AF, 3rd, Feldman HI, et al. A new  
407 equation to estimate glomerular filtration rate. *Ann Intern Med.* 2009 May 5;150(9):604-12. PMID:  
408 19414839. doi: 10.7326/0003-4819-150-9-200905050-00006.
- 409 13. Chapter 2: Definition, identification, and prediction of CKD progression. *Kidney international*  
410 *supplements.* 2013 Jan;3(1):63-72. PMID: 25018976. doi: 10.1038/kisup.2012.65.
- 411 14. C. QDHFSRBRMNSTSQCCCWTS. Novel Serum and Urinary Metabolites Associated  
412 with Diabetic Retinopathy in Three Asian Cohorts. *Metabolites.* 2021;11(9).
- 413 15. Chong YH, Fan Q, Tham YC, Gan A, Tan SP, Tan G, et al. Type 2 Diabetes Genetic Variants  
414 and Risk of Diabetic Retinopathy. *Ophthalmology.* 2017 Mar;124(3):336-42. PMID: 28038984. doi:  
415 10.1016/j.ophtha.2016.11.016.
- 416 16. Sabanayagam C, Chee ML, Banu R, Cheng CY, Lim SC, Tai ES, et al. Association of  
417 Diabetic Retinopathy and Diabetic Kidney Disease With All-Cause and Cardiovascular Mortality in a  
418 Multiethnic Asian Population. *JAMA Netw Open.* 2019 Mar 1;2(3):e191540. PMID: 30924904. doi:  
419 10.1001/jamanetworkopen.2019.1540.
- 420 17. Hastie T, Tibshirani R, Friedman J. *The Elements of Statistical Learning : data mining,*  
421 *inference, and prediction.:* Springer New York, NY; 2009.

- 422 18. Ravizza S, Huschto T, Adamov A, Bohm L, Busser A, Flother FF, et al. Predicting the early  
423 risk of chronic kidney disease in patients with diabetes using real-world data. *Nat Med*. 2019  
424 Jan;25(1):57-9. PMID: 30617317. doi: 10.1038/s41591-018-0239-8.
- 425 19. Song X, Waitman LR, Yu AS, Robbins DC, Hu Y, Liu M. Longitudinal Risk Prediction of  
426 Chronic Kidney Disease in Diabetic Patients Using a Temporal-Enhanced Gradient Boosting  
427 Machine: Retrospective Cohort Study. *JMIR Med Inform*. 2020 Jan 31;8(1):e15510. PMID:  
428 32012067. doi: 10.2196/15510.
- 429 20. Huang J, Huth C, Covic M, Troll M, Adam J, Zukunft S, et al. Machine Learning Approaches  
430 Reveal Metabolic Signatures of Incident Chronic Kidney Disease in Individuals With Prediabetes and  
431 Type 2 Diabetes. *Diabetes*. 2020 Dec;69(12):2756-65. PMID: 33024004. doi: 10.2337/db20-0586.
- 432 21. Nusinovici S, Tham YC, Chak Yan MY, Wei Ting DS, Li J, Sabanayagam C, et al. Logistic  
433 regression was as good as machine learning for predicting major chronic diseases. *J Clin Epidemiol*.  
434 2020 Jun;122:56-69. PMID: 32169597. doi: 10.1016/j.jclinepi.2020.03.002.
- 435 22. Nelson RG, Grams ME, Ballew SH, Sang Y, Azizi F, Chadban SJ, et al. Development of Risk  
436 Prediction Equations for Incident Chronic Kidney Disease. *Jama*. 2019 Nov 8. PMID: 31703124. doi:  
437 10.1001/jama.2019.17379.
- 438 23. Mathi Thumilan B, Sajeevan RS, Biradar J, Madhuri T, K NN, Sreeman SM. Development  
439 and Characterization of Genic SSR Markers from Indian Mulberry Transcriptome and Their  
440 Transferability to Related Species of Moraceae. *PLoS One*. 2016;11(9):e0162909. PMID: 27669004.  
441 doi: 10.1371/journal.pone.0162909.
- 442 24. Huang W, Man Y, Gao C, Zhou L, Gu J, Xu H, et al. Short-Chain Fatty Acids Ameliorate  
443 Diabetic Nephropathy via GPR43-Mediated Inhibition of Oxidative Stress and NF-kappaB Signaling.  
444 *Oxid Med Cell Longev*. 2020;2020:4074832. PMID: 32831998. doi: 10.1155/2020/4074832.
- 445
